# Supplementary figures and images for: A visual pathway for skylight polarization processing in Drosophila
Source: eLife journal article supplement (doi:10.7554/elife.63225), 2021-03-22

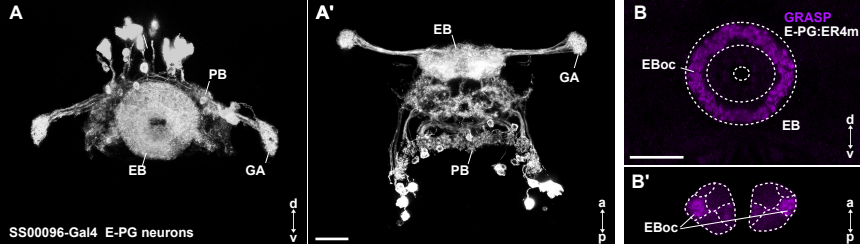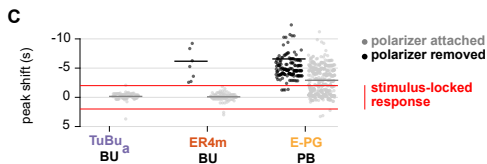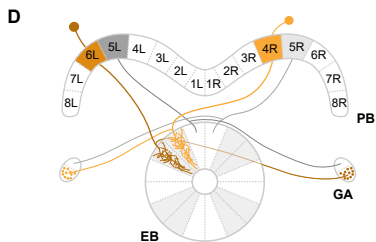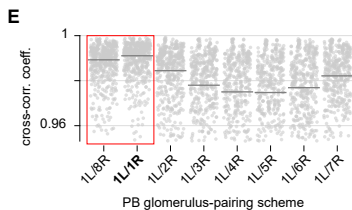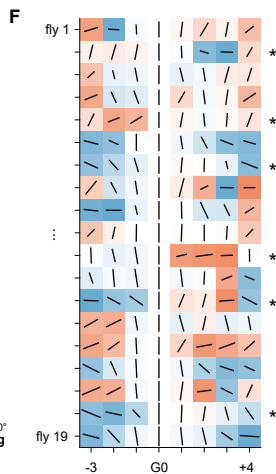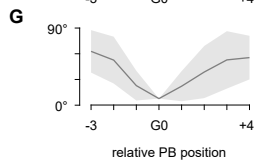

Supplement: supp [file elife_poa_e63225_Figure_10_figure_supplement_1.pdf › elife_poa_e63225_Figure_10_figure_supplement_1.pdf]

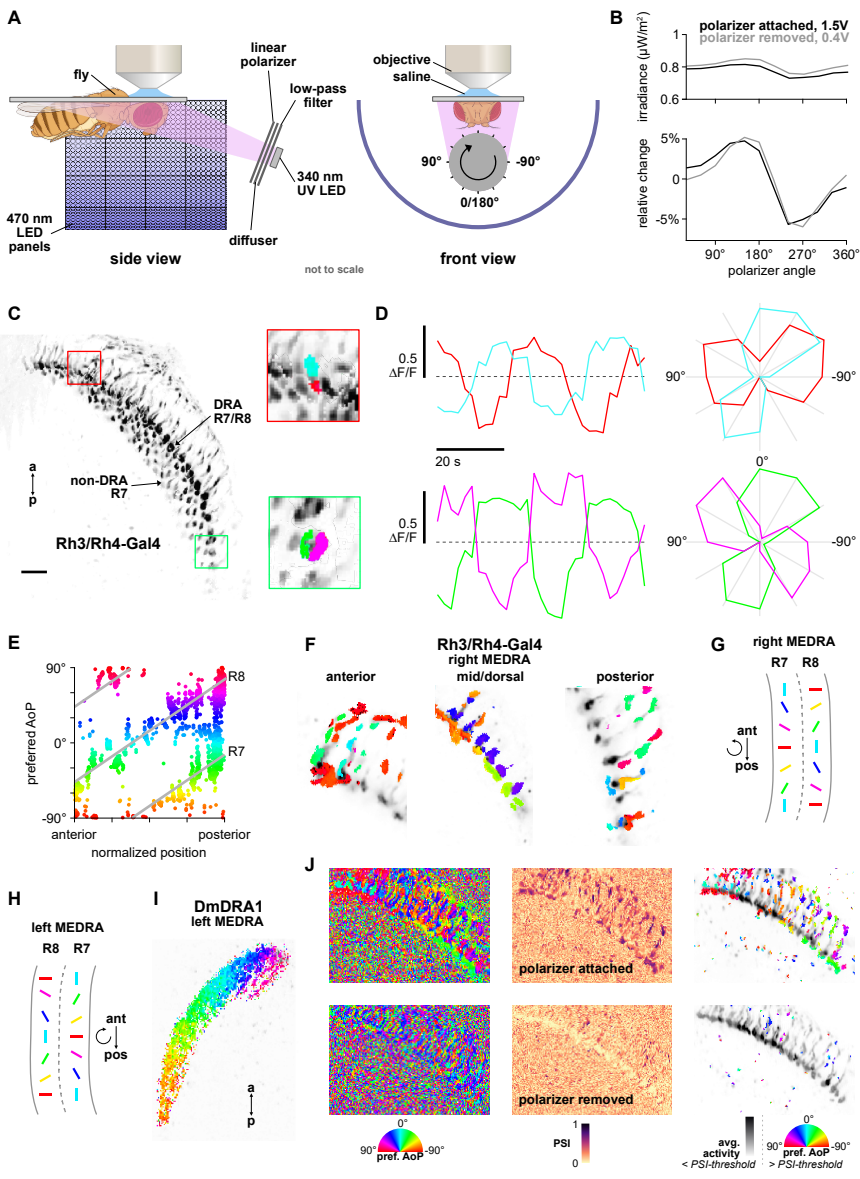

Supplement: supp [file elife_poa_e63225_Figure_1_figure_supplement_1.pdf › elife_poa_e63225_Figure_1_figure_supplement_1.pdf]

polarizer attached

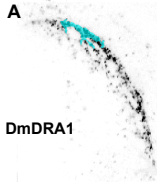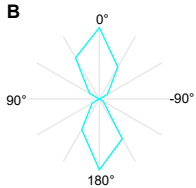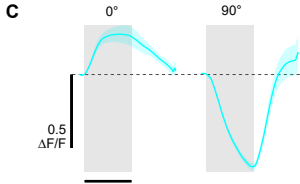

polarizer removed

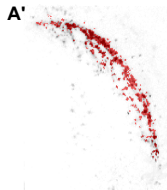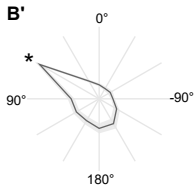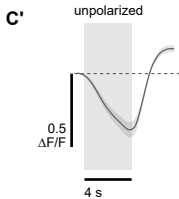

Supplement: supp [file elife_poa_e63225_Figure_1_figure_supplement_2.pdf › elife_poa_e63225_Figure_1_figure_supplement_2.pdf]

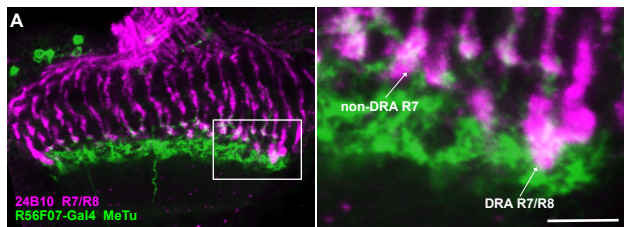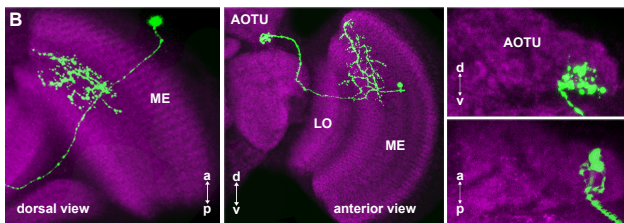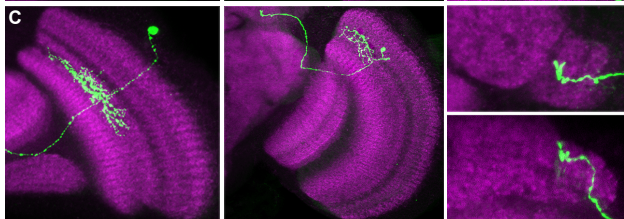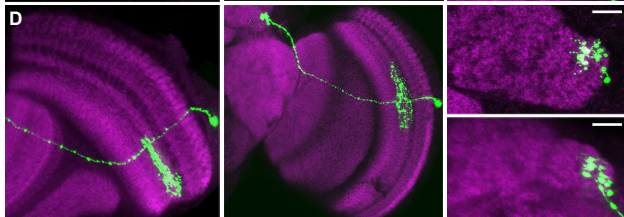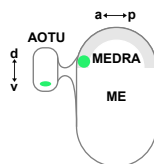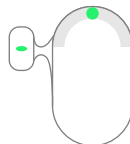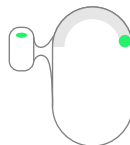

Supplement: supp [file elife_poa_e63225_Figure_2_figure_supplement_1.pdf › elife_poa_e63225_Figure_2_figure_supplement_1.pdf]

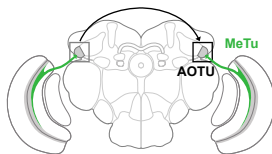

**A**

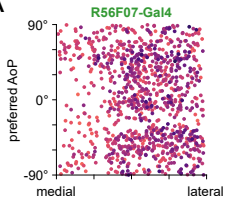

**C**

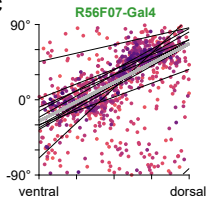

**E**

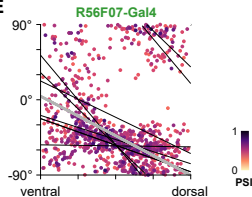

**B**

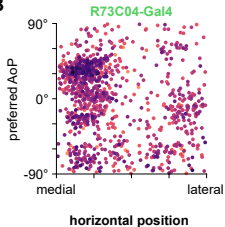

**D**

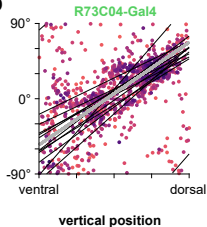

**E'**

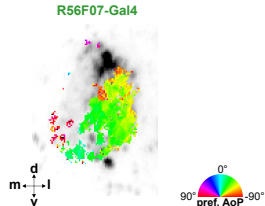

Supplement: supp [file elife_poa_e63225_Figure_3_figure_supplement_1.pdf › elife_poa_e63225_Figure_3_figure_supplement_1.pdf]

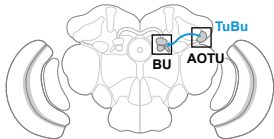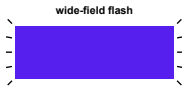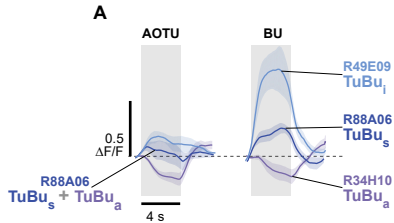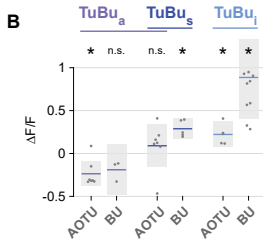

Supplement: supp [file elife_poa_e63225_Figure_6_figure_supplement_1.pdf › elife_poa_e63225_Figure_6_figure_supplement_1.pdf]

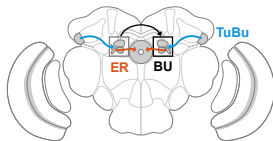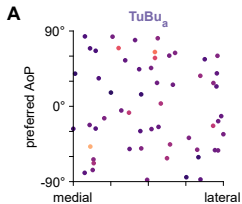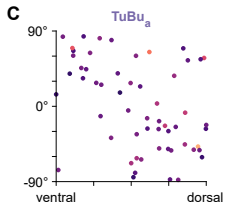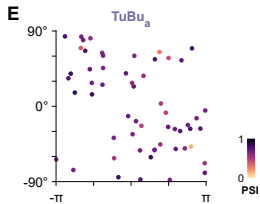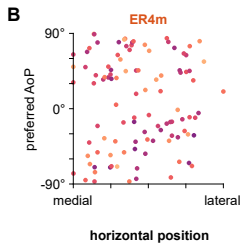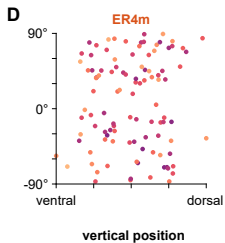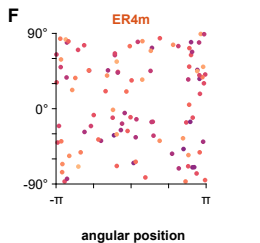

Supplement: supp [file elife_poa_e63225_Figure_8_figure_supplement_1.pdf › elife_poa_e63225_Figure_8_figure_supplement_1.pdf]
